# Supplementary material for: Antibody catalyzed modification of amino acids. Efficient hydrolysis of tyrosine benzoate
Source: Royal Society of Chemistry journal article supplement (doi:10.1039/b100450f), 2001-01-01
Supplement: b100450f.doc [file b100450f.doc]

# Supplementary data

**Antibody Catalyzed Modification of Amino Acids. Efficient Hydrolysis of Tyrosine Benzoate**

**Fabio Benedetti,a* Federico Berti,a* Alfonso Colombatti,b Massimiliano Flego,a Lucia Gardossi,c Paolo Linda,c Silvia Peressini.a**

*a: Dipartimento di Scienze Chimiche, Università di Trieste, Via Giorgieri 1, I-34127 Trieste, Italy.*

*b: Dipartimento di Scienze e Tecnologie Biomediche, Università di Udine, and CRO – IRCSS, Aviano. P.le Kolbe 4, I-33100, Udine, Italy.*

*c: Dipartimento di Scienze Farmaceutiche, Università di Trieste, P.le Europa 1, I-34127 Trieste, Italy.*

**Synthesis of hapten 2**

**Scheme 1.** *Reagents and conditions:*a) PhPOCl2 (1 equiv.), Py, Et2O; b) H2O, H+; c) KOH (0.1M), MeOH/H2O.

***N*-Cbz-Tyrosine Methyl Ester O-Phenylphosphonate 8**

A solution of *N*-Cbz-Tyrosine methyl ester (1.0 g, 3 mmol) and dry pyridine (0.34 ml) in 20 ml of ether is added dropwise to phenylphosphonic dichloride (585 mg, 3 mmol) in 20 ml dry ethyl ether under an argon atmosphere. After 15 hours at room temperature ether is added (20 ml) and the solution is washed with water, 10% hydrochloric acid and brine. The organic phase is dried over anhydrous sodium sulfate and evaporated under reduced pressure and the oily residue is purified by flash chromatography on silica, with a 99:1 mixture of dichloromethane and methanol as eluant, to give 1.2 g of compound **8** as a white solid (83%).

**m.p.** 165 °C. **IR** (KBr)  (cm-1): 1230, 1260, 1440, 1520, 1730, 1750, 2200-3300, 3350, 3440. **1H-NMR** (400 MHz, d6-DMSO)  2.9 (dd, 2H, -CH2); 3.6 (s, 3H, OCH3); 4.6 (m, 1H, -CH); 5.1 (dd, 2H, OCH2); 5.3 (d, 1H, NH); 6.8-7.0 (dd, 4H, Tyr Ar); 7.2-7.3 (m, 5H, Cbz Ar); 7.4 (m, 2H, m-C6H5P); 7.5 (t, 1H, p-C6H5P); 7.8 (dd, o-C6H5P). **13C-NMR** (100 MHz, d6-DMSO) 37.5 (b-CH2); 52.2 (OCH3); 55.0 (-CH); 67.0 (OCH2); 121.0 (d, JC-P=4.2Hz, C3 Tyr Ar); 127.5 (C4 Cbz Ar); 128.1 (C2 Cbz Ar); 128.2 (d, JC-P=13.5 Hz, C2 ArP); 128.2 (C3 Cbz Ar); 128.5 (C1 Tyr Ar); 130.2 (C2 Tyr Ar); 131.6 (d, JC-P=10.3 Hz, C3 ArP); 132.0 (C4 ArP); 136.2 (C1 Cbz Ar); 149.5 (d, JC-P=7.4 Hz, C4 Tyr Ar); 155.7 (OCONH); 172.0 (CO). **ESMS** 470 [MH]+; 492 [M+Na]+; 508 [M+K]+.

***N*-Cbz-Tyrosine O-Phenylphosphonate 2**

130 mg of methyl ester **8** are hydrolyzed in 50 ml of a 0.1 M solution of potassium hydroxide in 20% aqueous methanol for 5 hours at room temperature. Water is then added to the solution (250 ml) and the pH is lowered to 2 with 2M sulfuric acid. The solution is extracted for 3 times with ethyl acetate, and the organic phase is washed with water and dried over anhydrous sodium sulfate. The solvent is removed to give 100 mg of a pale yellow oil which crystallizes on standing (79%).

**m.p.** 197 °C, from acetone/water. = + 6.2 (c=0.7, DMSO). **IR** (KBr)  (cm-1): 1230, 1260, 1440, 1510, 1730, 1750, 2050-3300, 3350, 3440. **1H-NMR** (400 MHz, d6-DMSO)  2.9 (dd, 2H, -CH2); 4.2 (m, 1H, -CH); 5.0 (dd, 2H, OCH2); 7.0-7.2 (dd, 4H, Tyr Ar); 7.2-7.3 (m, 5H, Cbz Ar); 7.4-7.6 (m, 3H, m and p-C6H5P); 7.8 (m, o-C6H5P). **13C-NMR** (100 MHz, D2O) 39.7 (-CH2); 60.0 (-CH); 69.0 (OCH2); 123.6 (d, JC-P=4 Hz, C3 Tyr Ar); 130.2 (C4 Cbz Ar); 131.0 (d, JC-P=13.5 Hz, C2 ArP); 131.2 (C2 Cbz Ar); 131.3 (C3 Cbz Ar); 131.5 (C1 Tyr Ar); 133.0 (C2 Tyr Ar); 133.9 (d, JC-P=9.4 Hz, C3 ArP); 134.1 (C4 ArP); 135.9 (C1 Cbz Ar); 153.0 (d, JC-P=7.4 Hz, C4 Tyr Ar); 155.8 (OCONH); 181.0 (CO). **ESMS** 456 [MH]+; 478 [M+Na]+; 596 [M+K]+. **An.** calcd. for C23H22NO7P: C 60.7 %, H 4.87 %, N 3.08 %; found C 60.3 %, H 4.23 %, N 2.95 %.

**Preparation of the immunogenic conjugate**

A solution of phosphonate **2** (2 mg) in 500 ml of 0.1 M MES buffer containing NaCl (0.9 M) and DMF (20% v/v), at pH 4.5, is added to a solution of cBSA (2 mg) in 500 ml of milliQ water. EDC is added (2 mg) and the mixture is stirred for 2 hours at room temperature. The white precipitate formed is removed by centrifugation, and the solution is dialysed against water at 4° C. The conjugate is purified by gel filtration over G-25 and a mean value of 17 molecules of hapten bound per molecule of cBSA is obtained by spectrophotometric analysis.

**Purification of monoclonal antibodies**

Purified antibody 517A41 was obtained from the supernatant of the hybridoma cell culture (RPMI Sigma with 15% FCS), while antibody 522C2 was obtained from both supernatants and ascitic fluids. Isolation from large volumes of supernatants started with ammonium sulfate precipitation of the antibody, and was followed by dialysis against PBS buffer and purification on Gamma-bind+ Sepharose (Recombinant protein G, Pharmacia). Ascitic fluids were loaded directly on the Gamma-bind+ column after filtration and removal of the fatty fraction. The column was washed with PBS buffer until all the unbound proteins were removed, and then the antibody fraction was eluted with 0.5 M ammonium acetate, pH 3. The pH was immediately raised to neutral with 1M TRIS pH 9, and then the antibody fractions were dialysed against the kinetic buffers (PBS or TRIS 10 mM, NaCl 100 mM, pH 8.0). The Gamma-bind purified antibody fraction was also submitted to further purification on a DEAE-Sepharose Fast Flow ion exchange column (Pharmacia). The antibody dissolved in 10 mM TRIS buffer at pH 8.5 was loaded on the column, which was washed with the same buffer. The antibody was then eluted in a gradient of sodium chloride. The antibody thus purfied by both affintiy and ion exchange chromatography was tested on the hydrolysis of substrate **1**. The purity of the antibody was assessed by SDS-PAGE, and was always >95%. The concentration of antibody was determined either spectrophotometrically or by a bicynchoninic acid (BCA) test using a reference mouse IgG solution for calibration.

**Kinetic measurements**

Kinetic measurements in the presence of antibodies were carried out in TRIS buffer 10 mM, NaCl 100 mM, pH 8 at 25±0.1°C, or in PBS buffer, pH 7.5 at 30±0.1°C. The concentration of antibody was usually set to 5-10 M by dilution of the purified batches. Aliquots of a stock solution of substrates (in dioxane for esters **1**, **3a-d** and **5**; in DMSO for substrates **6** and **7)** were added to a final concentration of 10% dioxane or 30% DMSO, in a final volume of 500 L. The concentration of the substrates ranged from 10 to 200 M for esters **1**, **6** and **7** and from 5 to 500 M for substrates **3** and **5**. The reactions were followed spectrophotometrically at 250 nm for tyrosine benzoates **1**, **6** and **7**, at 400 nm for p-nitrophenyl esters **3** and at 260 nm for the p-nitrobenzyl ester **5**. The observed initial rates were obtained, for the first 5% of reaction, from the slopes of plots of the concentration of substrate against time. The initial rates of the catalyzed reactions were corrected by subtracting the values obtained from runs carried out in the absence of antibody. Hydrolysis of the substrates was always followed for the whole reaction verifying that the overall spectral change corresponded to the complete conversion to products. The composition of the final mixture for the hydrolysis of compound **1** was also confirmed by HPLC. The uncatalyzed observed rate constants were obtained under the same experimental conditions from the slopes of plots of log(A-A) against time. Inhibition experiments were carried out on the hydrolysis of substrate **1** and **3a** by running the hydrolyses in the presence of equimolar amounts of haptens **2** and **4**.

**Figure 1:** Lineweaver – Burk plots for the 522C2–catalyzed hydrolysis of ester **1** in TRIS (pH 8) and PBS (pH 7.5) buffers.
